# Supplementary material for: Distinguishing wavelength using two parallelly stacking graphene/thin Si/graphene heterojunctions
Source: Royal Society of Chemistry journal article supplement (doi:10.1039/d1tc01871j), 2021-01-01
Supplement: d1tc01871j1.pdf [file d1tc01871j1.pdf]

Supporting information for

**Distinguishing Wavelength Using Two Horizontally Stacking Graphene/Thin  
Si/Graphene Heterojunctions**

*Lin-Bao Luo\*, Ting Fang, Chao Xie, Li Wang\*, Di Wu and Feng-Xia Liang\**

Prof. L. B. Luo, Ms T. Fang, Dr L. Wang  
School of Electronic Science and Applied Physics, Hefei University of Technology, Hefei,  
230009, China  
E-mail: [luolb@hfut.edu.cn](mailto:luolb@hfut.edu.cn), [wlhgd@hfut.edu.cn](mailto:wlhgd@hfut.edu.cn)

Dr C. Xie  
School of Electronics and Information Engineering, Anhui University, Hefei, Anhui  
230601, P. R. China

Dr D. Wu  
*School of Physics and Microelectronics, Zhengzhou University, Zhengzhou 450052, China*

Dr F. X. Liang  
School of Materials Sciences and Engineering, Hefei University of Technology, Hefei, 230009,  
China  
E-mail: [fxliang@hfut.edu.cn](mailto:fxliang@hfut.edu.cn)

Figure

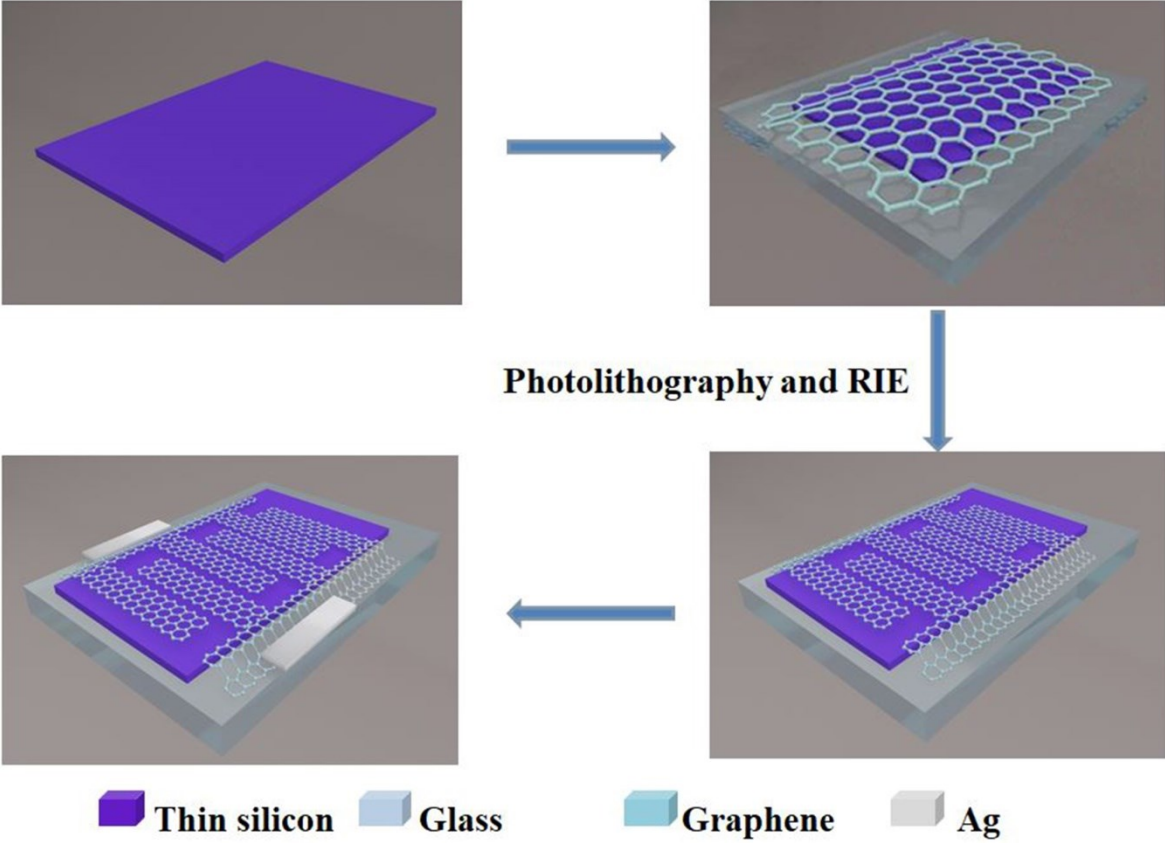

Figure S1. The flow chart of single graphene/thin Si heterojunction photodetector.

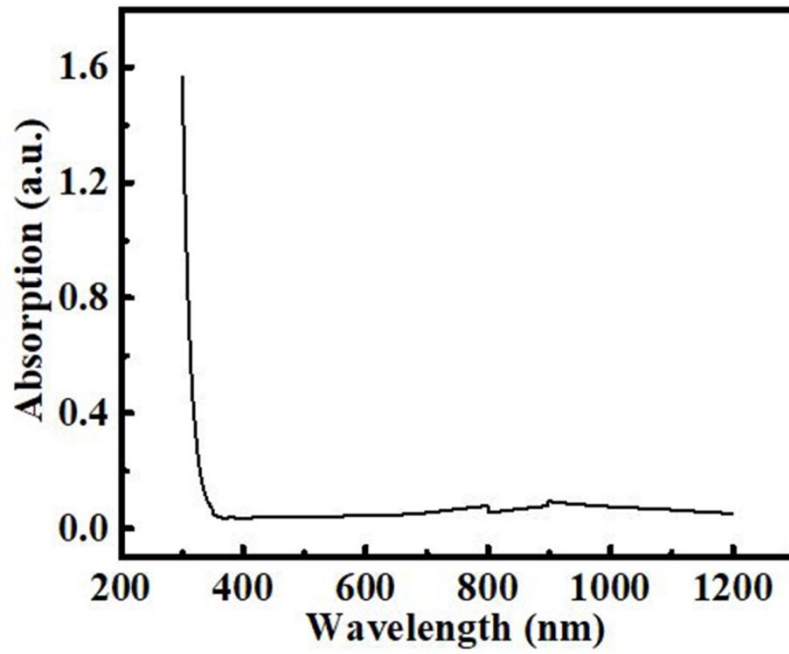

Figure S2. The absorption of glass.

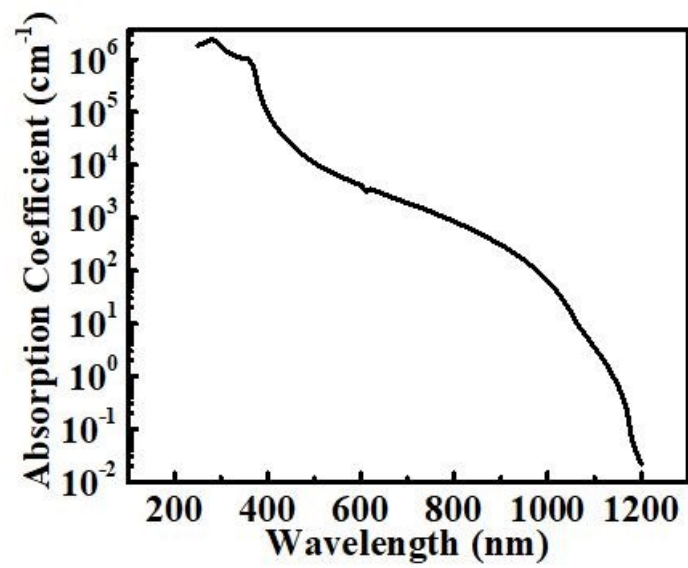

Figure S3. Absorption coefficient as a function of wavelength.

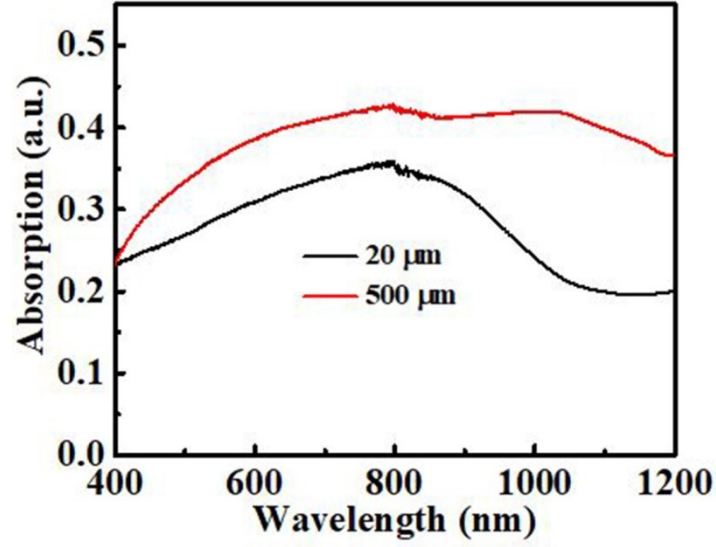

**Figure S4.** Light absorption spectra of thin Si substrates with varied thickness of 20 and 500  $\mu\text{m}$ .

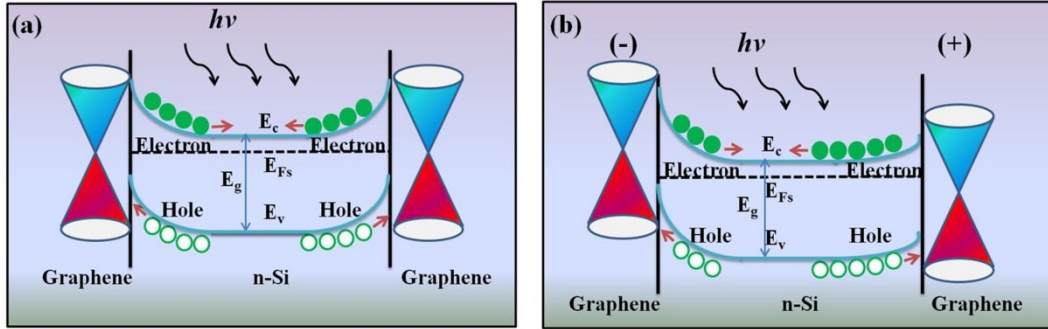

**Figure S5.** (a) Energy band diagram of the Gr/thin Si/Gr heterojunction photodetector at a bias voltage of 0 V. (b) Energy band diagram of the Gr/thin Si/Gr heterojunction photodetector at forward bias voltage.

**Table S1.** Typical photodetection performances of Gr/Si heterostructure based devices.

| Devices                                            | $R[\text{A W}^{-1}]$ | $D^*[\text{Jones}]$   | $EQE[\%]$ | Wavelength[nm] | Ref       |
|----------------------------------------------------|----------------------|-----------------------|-----------|----------------|-----------|
| Graphene/ $\text{WS}_2$ / $n$ -Si                  | 54.5                 | $4.1 \times 10^{12}$  | -         | 800            | [1]       |
| Graphene/Si                                        | 52                   | -                     | -         | 780            | [2]       |
| Graphene/ $n$ -Si with interdigital $\text{SiO}_2$ | 0.635                | -                     | 98        | 850            | [3]       |
| Graphene/Si                                        | 0.73                 | $5.77 \times 10^{13}$ | -         | 890            | [4]       |
| Graphene/ Thin Si                                  | 0.0505               | $1.49 \times 10^{12}$ | 7.72      | 810            | This Work |

**Calculation of hole diffusion length:**

$$L_p = \sqrt{D_p * \tau_p} \quad (1)$$

$$D_p = \frac{K * T}{q} * \mu_p \quad (2)$$

Where  $\mu_p$  is hole mobility,  $\tau_p$  is carrier life time. The experimental result is 316  $\mu\text{m}$  ( $KT/q=1/40$ ,  $\mu_p=500 \text{ cm}^2 \text{ V}^{-1} \text{ s}^{-1}$ ),  $\tau_p=200 \mu\text{s}$ ).

### Calculation of responsivity, specific detectivity, and EQE:

To quantitatively assess the photoresponse of the color photodetector, both responsivity ( $R$ ) and specific detectivity ( $D^*$ ) are calculated. The responsivity which is defined as the photocurrent generated per unit power of the incident light on the effective area of a photodetector can be estimated using the following equation:[5]

$$R = \frac{I_\lambda - I_d}{P_\lambda S} \quad (3)$$

Where  $I_\lambda$  is the photocurrent,  $P_\lambda$  is the light intensity,  $I_d$  is the dark current,  $S$  is the effective illuminated area ( $S = 0.48 \text{ cm}^2$ ). By using the above equation, and many experimental values ( $I_\lambda = 1.23 \times 10^{-8} \text{ A}$ ,  $I_d = 1.72 \times 10^{-9} \text{ A}$ ,  $P = 5.00 \times 10^{-4} \text{ W cm}^{-2}$ ), the  $R$  at a bias voltage of 2 V was estimated to be 50.46  $\text{mA W}^{-1}$ .

In addition, the  $D^*$  represents the capability of a photodetector to probe the weakest optical signal, and can be expressed as:[6]

$$D^* = \frac{R\sqrt{S}}{\sqrt{2eI_d}} \quad (4)$$

Where  $R$  is the responsivity,  $S$  is the effective area of the photodetector,  $e$  is the electronic charge, and  $I_d$  is the dark current. Based on the above equation as well as many constants derived from experiment ( $R = 50.46 \text{ mA W}^{-1}$ ,  $I_d = 1.72 \times 10^{-9} \text{ A}$ ,  $e = 1.602 \times 10^{-19} \text{ C}$ ), the  $D^*$  at a bias voltage of 2 V is calculated to be  $1.49 \times 10^{12}$  Jones.

As a matter of fact, similar evolution is also observed on external quantum efficiency (EQE),

which is defined as the number of electrons probed per incident photon and can be estimated by the equation:

$$EQE = \frac{hcR_{\lambda}}{e\lambda} \quad (5)$$

where  $h$  is the Planck's constant,  $c$  is the velocity of light,  $e$  is the electronic charge, and  $\lambda$  is the exciting wavelength, respectively. The  $EQE$  at a light intensity of  $500 \mu W cm^{-2}$  is 7.72%.

**The equations for different light intensities:**

$$y = 0.000020 \times e^{\frac{\lambda}{106.66}} + 0.0090 \quad p = 500 \mu W cm^{-2} \quad (6)$$

$$y = 0.000016 \times e^{\frac{\lambda}{104.52}} + 0.0094 \quad p = 800 \mu W cm^{-2} \quad (7)$$

$$y = 0.000040 \times e^{\frac{\lambda}{115.39}} + 0.0076 \quad p = 1000 \mu W cm^{-2} \quad (8)$$

$$y = 0.000059 \times e^{\frac{\lambda}{120.91}} - 0.0068 \quad p = 1200 \mu W cm^{-2} \quad (9)$$

- [1] R. B. Xiao, C. Y. Lan, Y. J. Li, C. Zeng, T. Y. He, S. Wang, C. Li, Y. Yin, Y. Liu, High Performance Van der Waals Graphene–WS<sub>2</sub>–Si Heterostructure Photodetector, *Adv. Mater. Interfaces*, **2019**, 1901304.
- [2] T. Y. He, C. Y. Lan, C. Li, S. h. Zhou, Y. Yin, A Strategy for High-Performance Photodetector based on Graphene-Si heterostructure, *E3S Web of Conferences*, **2020**, 213, 02014.
- [3] S. Riazimehr, S. Kataria, J. M. Gonzalez-Medina, S. Wagner, M. Shaygan, S. Suckow, F. G. Ruiz, O. Engström, A. Godoy, M. C. Lemme, High Responsivity and Quantum Efficiency of Graphene/Silicon Photodiodes Achieved by Interdigitating Schottky and Gated Regions, *ACS Photonics*, **2019**, 6, 107.
- [4] X. M. Lin, M. Zhu, M. D. Du, Z. Lv, L. Zhang, Y. C. Li, Y. Yang, T. T. Yang, X. Li, K. L. Wang, H. W. Zhu, Y. Fang, High Detectivity Graphene-Silicon Heterojunction Photodetector, *small*, **2016**, 12, 595–601.
- [5] L. H. Zeng, M. Z. Wang, H. Hu, B. Nie, Y. Q. Yu, C. Y. Wu, L. Wang, J. G. Hu, C. Xie, F. X. Liang, L. B. Luo, Monolayer Graphene/Germanium Schottky Junction As High Performance Self-Driven Infrared Light Photodetector, *ACS Appl. Mater. Interfaces*, **2013**, 5, 9362-9366.
- [6] W. Y. Kong, G. A. Wu, K. Y. Wang, T. F. Zhang, Y. F. Zou, D. D. Wang, L. B. Luo, Graphene-β-Ga<sub>2</sub>O<sub>3</sub> Heterojunction for Highly Sensitive Deep UV Photodetector Application, *Adv. Mater.* **2016**, 28, 10725–10731.
